# Supplementary material for: Cabozantinib-induced osteoblast secretome promotes survival and migration of metastatic prostate cancer cells in bone
Source: PubMed Central journal article supplement (PMC5650395; doi:10.18632/oncotarget.20489), 2017-08-24
Supplement: oncotarget-08-74987-s001.pdf [file oncotarget-08-74987-s001.pdf]

# Cabozantinib-induced osteoblast secretome promotes survival and migration of metastatic prostate cancer cells in bone

## SUPPLEMENTARY MATERIALS

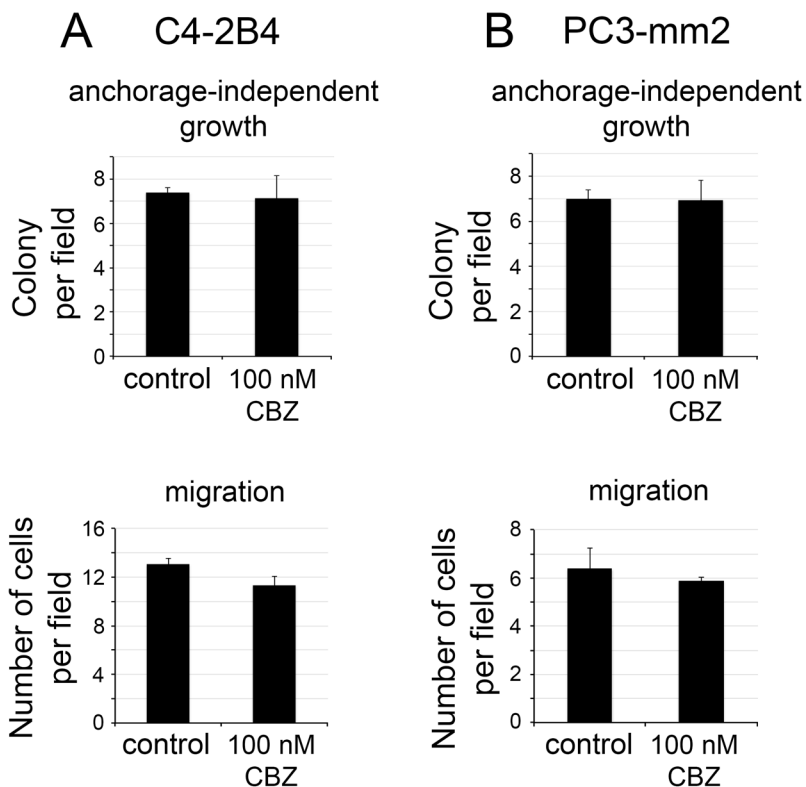

**Supplementary Figure 1:** Effect of cabozantinib on anchorage-independent growth and migration of C4-2B4 (A) or PC3- mm2 (B) prostate cancer cells.

Supplementary Table 1: Sequence of primers used in real-time RT-PCR

| Gene    |          | Direction | Sequence (5'-3')           | Size (base pair) | Product length |
|---------|----------|-----------|----------------------------|------------------|----------------|
| TGFβ1   | Primer 1 | FWD       | TGAGT GGCTG TCTTT TGACG    | 20               | 293            |
|         |          | REV       | TCTCT GTGGA GCTGA AGCAA    | 20               |                |
| DKK1    | Primer 3 | FWD       | GAGGG GAAAT TGAGG<br>AAAGC | 20               | 230            |
|         |          | REV       | GGTGC ACACC TGACC TTCTT    | 20               |                |
| WNT-16  | Primer 2 | FWD       | CTAGG CACCA AGGAG<br>ACAGC | 20               | 187            |
|         |          | REV       | ACATG CCGTA CTGGA CATCA    | 20               |                |
| LEFTY-1 | Primer 1 | FWD       | TGATT GTCAG CGTGA AGGAG    | 20               | 246            |
|         |          | REV       | GGAAG CAAAG AGCAC<br>ACACA | 20               |                |
| PAPPA   | Primer 3 | FWD       | GGCAGTGCTCTGAATCACAA       | 20               | 249            |
|         |          | REV       | GGGCTCCAAATTAGTGCCA        | 20               |                |
| IGFBP2  | Primer 2 | FWD       | GGTGTGTGAACCCCAATACC       | 20               | 221            |
|         |          | REV       | CAAAACTGGGAACCTCTCCA       | 20               |                |
| MET     | Primer 3 | FWD       | GAGAA ACTCT TCGGG CTGTG    | 20               | 213            |
|         |          | REV       | GTGAG GTGTG CTGTT CGAGA    | 20               |                |
| VEGFR2* | Primer 2 | FWD       | CAGCT TCCAA GTGGC TAAGG    | 20               | 264            |
|         |          | REV       | CAGAG CAACA CACCG<br>AAAGA | 20               |                |
| PLCL1   | Primer 2 | FWD       | ACCAG TTGGG GCAGA<br>TACAG | 20               | 209            |
|         |          | REV       | GCCAT TTGCT TGTGG TTTTT    | 20               |                |
| NOTCH2  | Primer 3 | FWD       | GCACG TGTGT TGATG GAATC    | 20               | 185            |
|         |          | REV       | CTGAC AGTTT TTCCC GGTGT    | 20               |                |
| CAV1    | Primer 2 | FWD       | CCAGC TTCAC CACCT TCACT    | 20               | 149            |
|         |          | REV       | GCTCT TGATG CACGG TACAA    | 20               |                |
| NFE2    | Primer 1 | FWD       | TGGCC ATGAA GATTC CTTC     | 20               | 123            |
|         |          | REV       | GACGG ATGTC CCGAA CTAGA    | 20               |                |
| RANKL   | Primer 1 | FWD       | AGCCG AGACT ACGGC AAGTA    | 20               | 208            |
|         |          | REV       | GCGCT CGAAA GTACA<br>GGAAC | 20               |                |
| PTPRV   | Primer 1 | FWD       | ACAGG TGGTC GATGT GTTCA    | 20               | 283            |
|         |          | REV       | ATAGT CAGGA GAGGG<br>CAGCA | 20               |                |
| SOX11   | Primer 3 | FWD       | CTGGT GGATA AGGAC CTGGA    | 20               | 153            |
|         |          | REV       | CGCCT CTCAA TACGT GAACA    | 20               |                |
| ITGA5   | Primer 3 | FWD       | CAAGG TGACA GGAAT<br>CAGCA | 20               | 224            |
|         |          | REV       | GCTGC AGACT ACGGC TCTCT    | 20               |                |
| DLK1    | Primer 1 | FWD       | CACAC GTTTC GCAAG<br>AAGAA | 20               | 242            |
|         |          | REV       | CCACC ACAA AAGCC AGACT     | 20               |                |
